# Supplementary material
Source: publisher site journal article supplement (http://www.kjim.org/upload/media/kjim-2021-272-suppl3.pdf)
Supplement: Supplementary file 1 [file kjim-2021-272-suppl3.pdf]

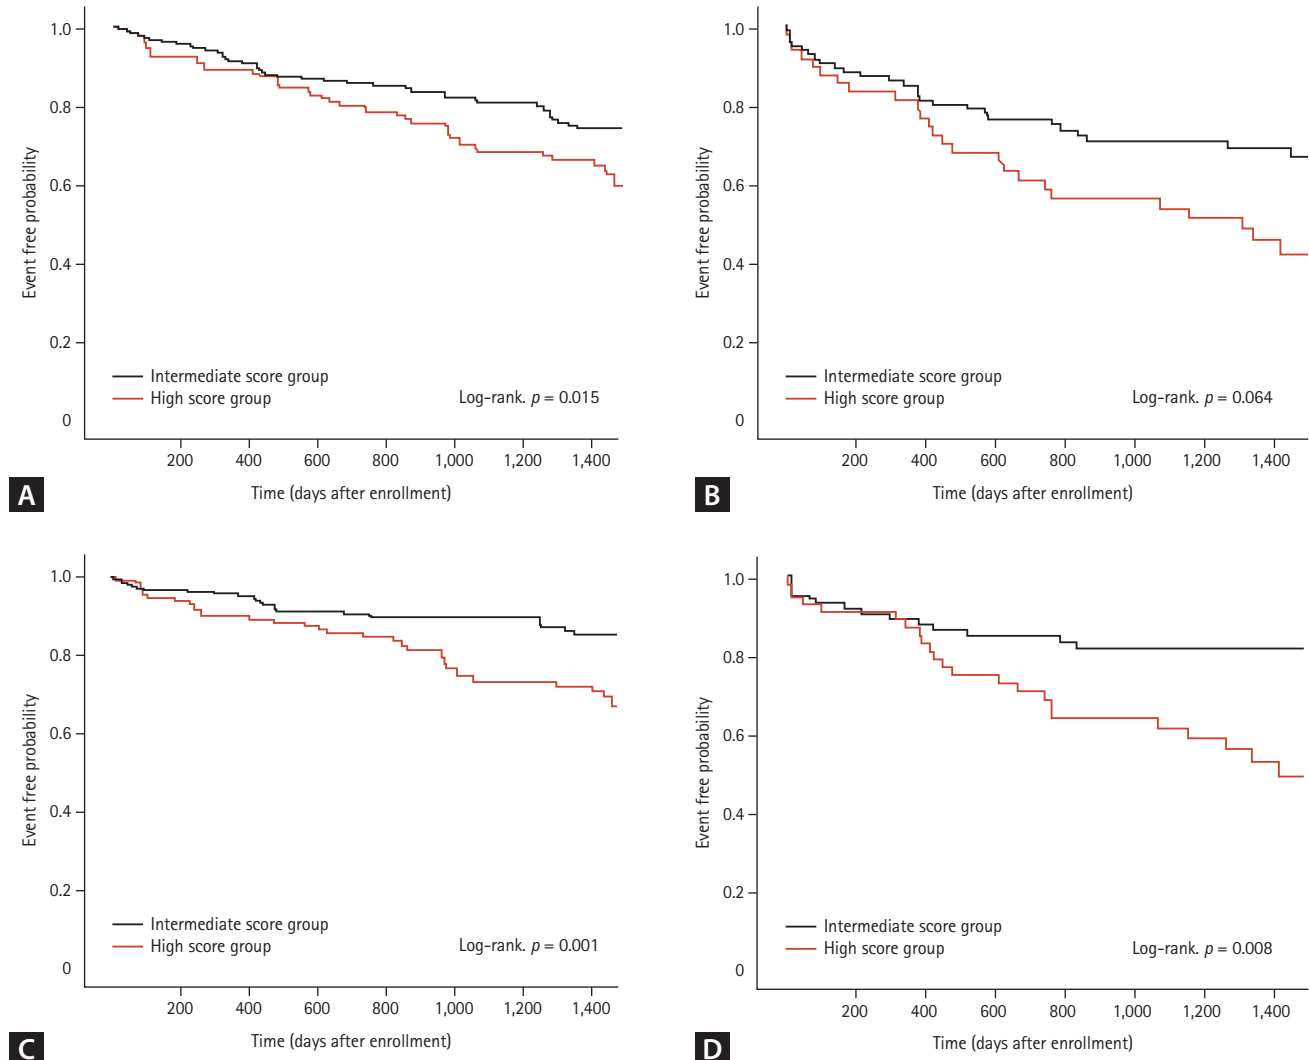

**Supplementary Figure 1.** Kaplan-Meier analyses after 1,500 days of follow-up for the endpoints according to HFA-PEFF scores in enrolled patients. (A) Composite cardiovascular disease (CVD) events in sinus rhythm (SR) patients. (B) Composite CVD events in atrial fibrillation (AF) patients. (C) Heart failure (HF)-related events in SR patients. (D) HF-related events in AF patients.
